# Supplementary material for: A Self-Regulation–Based eHealth and mHealth Intervention for an Active Lifestyle in Adults With Type 2 Diabetes: Protocol for a Randomized Controlled Trial
Source: PubMed Central journal article supplement (PMC6450483; doi:10.2196/12413), 2019-03-22
Supplement: resprot_v8i3e12413_app2.pdf [file resprot_v8i3e12413_app2.pdf]

## MyPlan 2.0 - Screenshots

Screenshots from the website:



# Mijn Actieplan



Oké Louise, je bent nu klaar om een actieplan op te stellen over hoe je meer wil bewegen! Vul hier dus niet in wat je al doet, maar stel een plan op voor hoe jij extra zal bewegen!

Hoe zou jij graag meer willen bewegen?

- Door te bewegen of sporten in mijn vrije tijd (bv. gaan joggen, wandelen, zwemmen, ...)
- Door meer te bewegen tijdens het huishouden, het werken in de tuin, ...
- Door meer te bewegen op en rond het werk/vrijwilligerswerk.
- Door me meer actief te verplaatsen (bv. met de fiets of te voet naar de winkel, het werk, ...).



**Fleur ( 26 jaar) vertelt:**

*"Ik vind het belangrijk om meer te bewegen, maar ik ben echt geen sportpersoon. Sinds ik echter te voet al mijn boodschappen doe, voel ik me minder vaak moe!"*

[Vorige](#) [Volgende](#)

Figure 1. Defining an action in the action planning module

The text in red is a success story.

Translation: "Fleur (26 years old) tells: I consider it important to be more physically active, but I am not a sporty person. Since I do all my groceries by foot, I feel less tired during the day!"

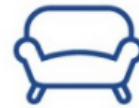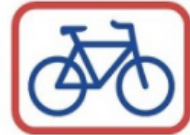

Een nieuw plan naleven is niet steeds gemakkelijk. Onderzoek toont aan dat het enorm belangrijk is om vooraf over mogelijke hindernissen na te denken. Wanneer deze hindernis zich dan daadwerkelijk voordoet, zal je meteen een oplossing voor de hand hebben!

Wat zou voor jou de belangrijkste hindernis zijn om meer te bewegen?

- Ik vrees dat ik mijn voornemen zal vergeten uitvoeren
- Het zou kunnen dat ik er op het moment zelf geen zin in heb
- Er kan iets anders tussenkomen (bv. een familiebezoekje, een onverwachte taak)
- Slecht weer
- Andere:

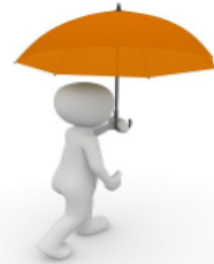

Vorige

Volgende

Figure 2. The coping planning module

Translation: "Living up to a new plan is not always easy. Research shows that it is really important to consider potential hindrances in advance. When this hindrance appears, you will have an immediate solution at hand!"

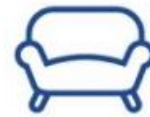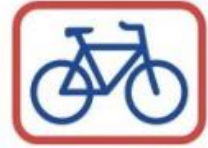

1. Is de volgende stelling juist of fout?

"Als je meer beweegt, verlaag je je risico op depressie."

- Juist
- Fout

Vorige

Volgende

Figure 3. Example of a quiz question

Translation: "Is the following statement true or false? If you are more physically active, you have a lower chance on developing a depression."

Screenshots from the mobile application:

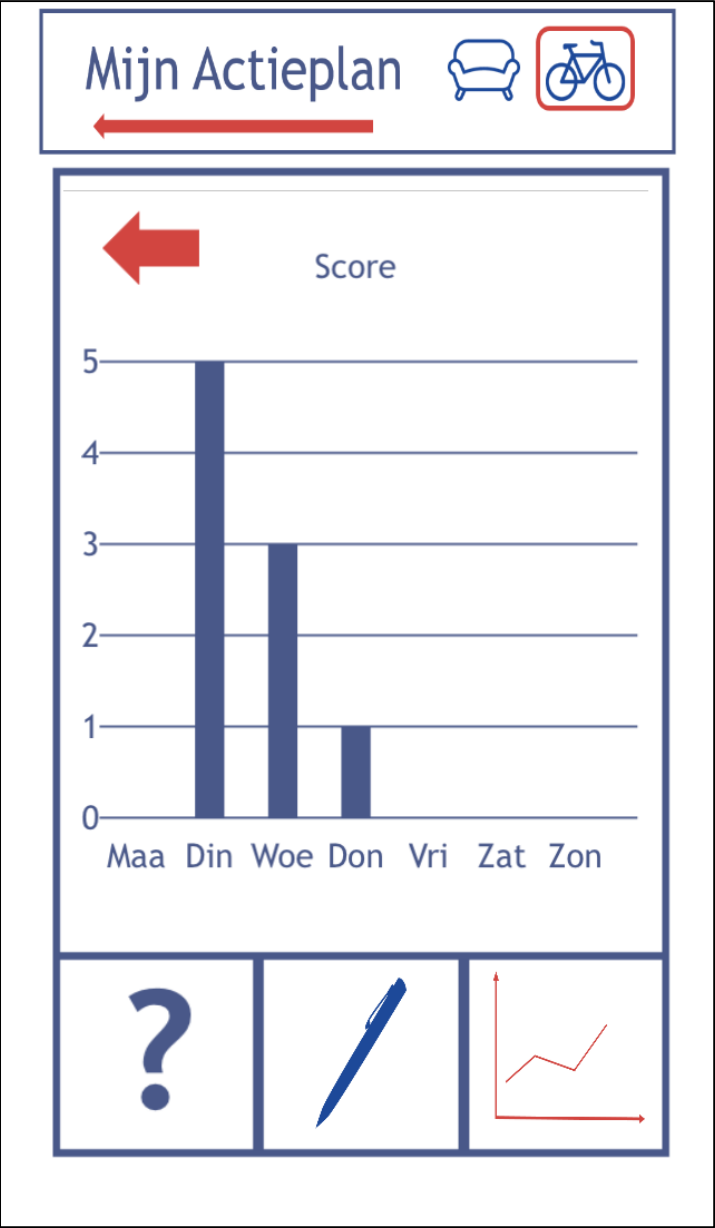

Figure 4. Monitoring health behaviours

Mijn Actieplan  

←

Hoe meer je beweegt, hoe tevredener je gemiddeld bent met je leven.

  

Figure 5. Quizzes

Translation: "In general, the more people are physically active, the more happy they are with their lives." Blue boxes: "True" and "False".

## Mijn Actieplan

Hieronder kan je jouw doelen vinden om meer te bewegen in je vrije tijd. Je kan je doelen aanpassen door op het potloodje te tikken.

**WAT** ga ik doen

Wandelen

**WANNEER** ga ik dit doen

| Ma | Di | Wo | Do | Vr | Za | Zo |
|----|----|----|----|----|----|----|
|    |    |    |    |    |    |    |

Figure 6. Revising and adapting plans

Translation: "Below you can find your goals to be more physically active during leisure time. You can adapt your goals by tapping on the pencil icon."

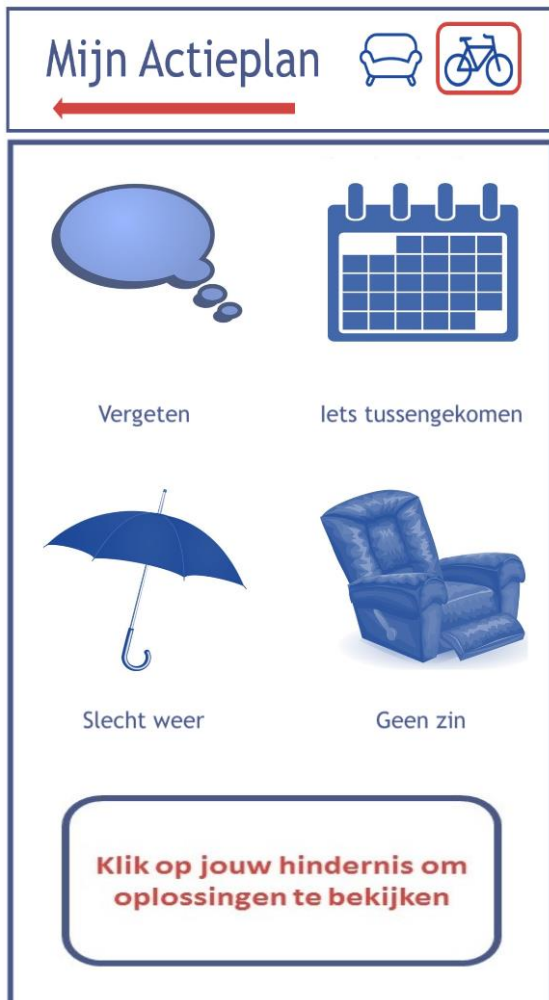

Figure 7. Coping planning module

Translation: "Tap on a hindrance to find solutions".
